# Supplementary material for: Antrodia cinnamomea Confers Obesity Resistance and Restores Intestinal Barrier Integrity in Leptin-deficient Obese Mice
Source: PubMed Central journal article supplement (PMC7146579; doi:10.3390/nu12030726), 2020-03-10
Supplement: nutrients-12-00726-s001.pdf [file nutrients-12-00726-s001.pdf]

**Table 1.** Primers for real time RT-PCR.

| Species             | Gene          | Direction | Sequence                      | Reference  |
|---------------------|---------------|-----------|-------------------------------|------------|
| <i>Mus musculus</i> | 18S ribosome  | Forward   | 5'-gtaaccggtgaacccatt-3'      | [1]        |
|                     |               | Reverse   | 5'-ccatccaatcggtagtagc-3'     |            |
| <i>Mus musculus</i> | TBP1          | Forward   | 5'-caaaccagaattgttctcctt-3'   | [2]        |
|                     |               | Reverse   | 5'-atgtggtcttctgaatcctt-3'    |            |
| <i>Mus musculus</i> | HPRT          | Forward   | 5'-gcctaagatgagcgcaagtt-3'    | [3]        |
|                     |               | Reverse   | 5'-tactaggcagatggccacagg-3'   |            |
| <i>Mus musculus</i> | CD36          | Forward   | 5'-ggagcaactggtggatggtt-3'    | [4]        |
|                     |               | Reverse   | 5'-ttgagactctgaaaggatcagca-3' |            |
| <i>Mus musculus</i> | ME1           | Forward   | 5'-ctcataggagttgctgcaattgg-3' | [4]        |
|                     |               | Reverse   | 5'-cgttgaaggcagccatattcc-3'   |            |
| <i>Mus musculus</i> | PPAR $\gamma$ | Forward   | 5'-gtgccagtttcgatccgtaga-3'   | [5]        |
|                     |               | Reverse   | 5'-ggccagcatcgttagatga-3'     |            |
| <i>Mus musculus</i> | SCD1          | Forward   | 5'-ccgggagaataatcctggttt-3'   | [4]        |
|                     |               | Reverse   | 5'-cactggcagagtagtcaagg-3'    |            |
| <i>Mus musculus</i> | ZO-1          | Forward   | 5'-atgcagaccagcaaagg-3'       | [6]        |
|                     |               | Reverse   | 5'-tggttttgtctcatatttctca-3'  |            |
| <i>Mus musculus</i> | ZO-2          | Forward   | 5'-ccgttcagcagcttaggaaa-3'    | This study |
|                     |               | Reverse   | 5'-gaacctccgggtctctt-3'       |            |
| <i>Mus musculus</i> | Ocln          | Forward   | 5'-gtccgtgaggcctttga-3'       | [7]        |
|                     |               | Reverse   | 5'-ggtgcataatgattgggttg-3'    |            |
| <i>Homo sapiens</i> | TBP1          | Forward   | 5'-gaacatcatggatcagaacaaca-3' | [8]        |
|                     |               | Reverse   | 5'-ataggattccgggagtcac-3'     |            |
| <i>Homo sapiens</i> | ZO-1          | Forward   | 5'-caacatacagtacgcttcaca-3'   | [9]        |
|                     |               | Reverse   | 5'-cactattgacgtttcccactc-3'   |            |
| <i>Homo sapiens</i> | ZO-2          | Forward   | 5'-ggccaggttacagagaatgc-3'    | [10]       |
|                     |               | Reverse   | 5'-gcttctgggcaatttcgat-3'     |            |
| <i>Homo sapiens</i> | PPAR $\gamma$ | Forward   | 5'-ccattacggagagatccacg-3'    | [11]       |
|                     |               | Reverse   | 5'-aggcattttgtcaaacgag-3'     |            |

## Reference

1. Rho, H.W., et al., Identification of valid reference genes for gene expression studies of human stomach cancer by reverse transcription-qPCR. *BMC Cancer*, 2010. **10**: p. 240.
2. Wang, F., et al., Normalizing genes for real-time polymerase chain reaction in epithelial and nonepithelial cells of mouse small intestine. *Anal Biochem*, 2010. **399**(2): p. 211-7.
3. Carrel, L., P.A. Hunt, and H.F. Willard, Tissue and lineage-specific variation in inactive X chromosome expression of the murine Smcx gene. *Hum Mol Genet*, 1996. **5**(9): p. 1361-6.
4. Jais, A., et al., Heme oxygenase-1 drives metaflammation and insulin resistance in mouse and man. *Cell*, 2014. **158**(1): p. 25-40.
5. Galmozzi, A., et al., ThermoMouse: an in vivo model to identify modulators of UCP1 expression in brown adipose tissue. *Cell Rep*, 2014. **9**(5): p. 1584-1593.
6. Ruan, J.W., et al., Dual-specificity phosphatase 6 deficiency regulates gut microbiome and transcriptome response against diet-induced obesity in mice. *Nat Microbiol*, 2016. **2**: p. 16220.
7. Kim, M.S. and J.Y. Kim, Ginger attenuates inflammation in a mouse model of dextran sulfate sodium-induced colitis. *Food Sci Biotechnol*, 2018. **27**(5): p. 1493-1501.
8. Hubner, M., et al., Intronic miR-744 Inhibits Glioblastoma Migration by Functionally Antagonizing Its Host Gene MAP2K4. *Cancers (Basel)*, 2018. **10**(11).

9. Lv, J.W., et al., Inhibition of microRNA-214 promotes epithelial-mesenchymal transition process and induces interstitial cystitis in postmenopausal women by upregulating Mfn2. *Exp Mol Med*, 2017. **49**(7): p. e357.
10. Anderson, R.C., et al., *Lactobacillus plantarum* MB452 enhances the function of the intestinal barrier by increasing the expression levels of genes involved in tight junction formation. *BMC Microbiol*, 2010. **10**: p. 316.
11. Knarr, M., et al., miR-181a modulates circadian rhythm in immortalized bone marrow and adipose derived stromal cells and promotes differentiation through the regulation of PER3. *Sci Rep*, 2019. **9**(1): p. 307.

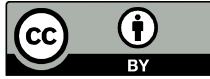

© 2020 by the authors. Licensee MDPI, Basel, Switzerland. This article is an open access article distributed under the terms and conditions of the Creative Commons Attribution (CC BY) license (<http://creativecommons.org/licenses/by/4.0/>).
